# Supplementary material
Source: Springer Nature journal article supplement (https://www.springermedizin.de/resource/supplementary/12885_2013_4478_MOESM3_ESM.pdf/9466528)

**A**

HS-578T

MDA-MB231

MDA-MB435

HCC 1187

HBL 100

BT549

HCC70

HCC3153

**AR**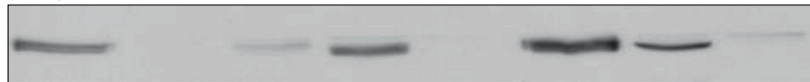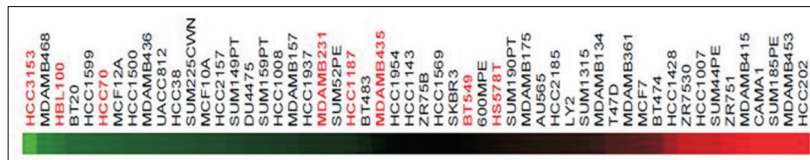

No Expression

Low-moderate Expression

High Expression

**B**

730 2561T

291 3035

2041 1569

2428 1041

37

845

2939 1790

795

278

503

1603

**AR****α-Tub**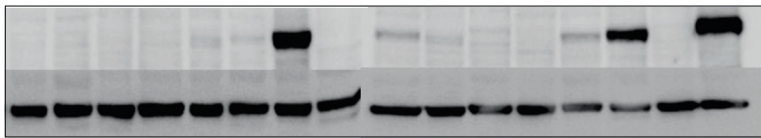

Supplement: MOESM3 [file 9466528]
